# Supplementary material for: Solvothermally-derived nanoglass as a highly bioactive material
Source: Royal Society of Chemistry journal article supplement (doi:10.1039/d1nr05984j), 2022-01-01
Supplement: d1nr05984j1.pdf [file d1nr05984j1.pdf]

## Supporting Information

# Solvothermally derived nanoglass as a highly bioactive material

*Marzena Fandzloch, <sup>a,\*</sup> Weronika Bodylska, <sup>a</sup> Katarzyna Roszek, <sup>b</sup> Katarzyna Halubek-Gluchowska, <sup>a</sup> Anna Jaromin, <sup>c</sup> Yuriy Gerasymchuk, <sup>a</sup> and Anna Łukowiak <sup>a,\*</sup>*

<sup>a</sup> Institute of Low Temperature and Structure Research, Polish Academy of Sciences, Okólna 2, 50-422 Wrocław, Poland.

<sup>b</sup> Faculty of Biological and Veterinary Sciences, Nicolaus Copernicus University in Toruń, Lwowska 1, 87-100 Toruń, Poland.

<sup>c</sup> Department of Lipids and Liposomes, Faculty of Biotechnology, University of Wrocław, Joliot-Curie 14a, 50-383 Wrocław, Poland.

Corresponding author e-mail:

m.fandzloch@intibs.pl

a.lukowiak@intibs.pl

## Table of Contents

|               |    |
|---------------|----|
| Fig. S1.....  | 3  |
| Fig. S2.....  | 4  |
| Fig. S3.....  | 5  |
| Fig. S4.....  | 5  |
| Fig. S5.....  | 5  |
| Fig. S6.....  | 6  |
| Fig. S7.....  | 7  |
| Fig. S8.....  | 7  |
| Fig. S9.....  | 8  |
| Fig. S10..... | 9  |
| Fig. S11..... | 10 |
| Fig. S12..... | 10 |

(a)

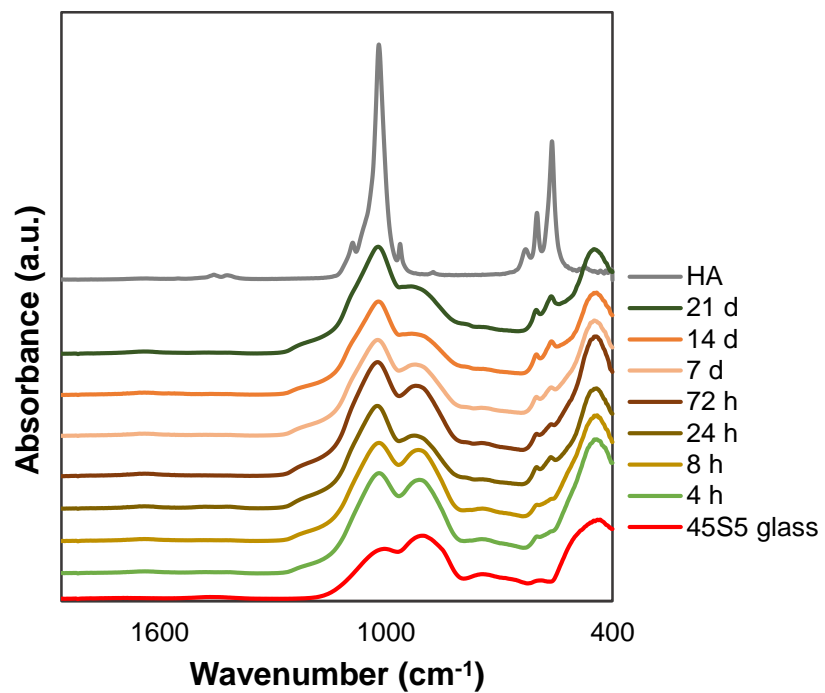

(b)

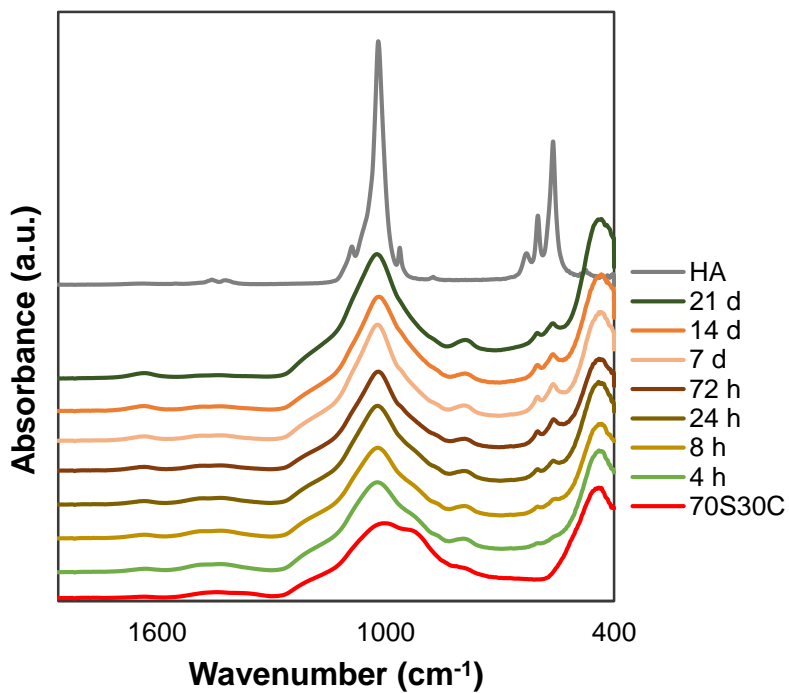

**Fig. S1** IR-ATR spectra of 45S5 glass (a) and 70S30C (b) after different incubation times (DPBS, 37 °C, 4 h – 21 d).

(a)

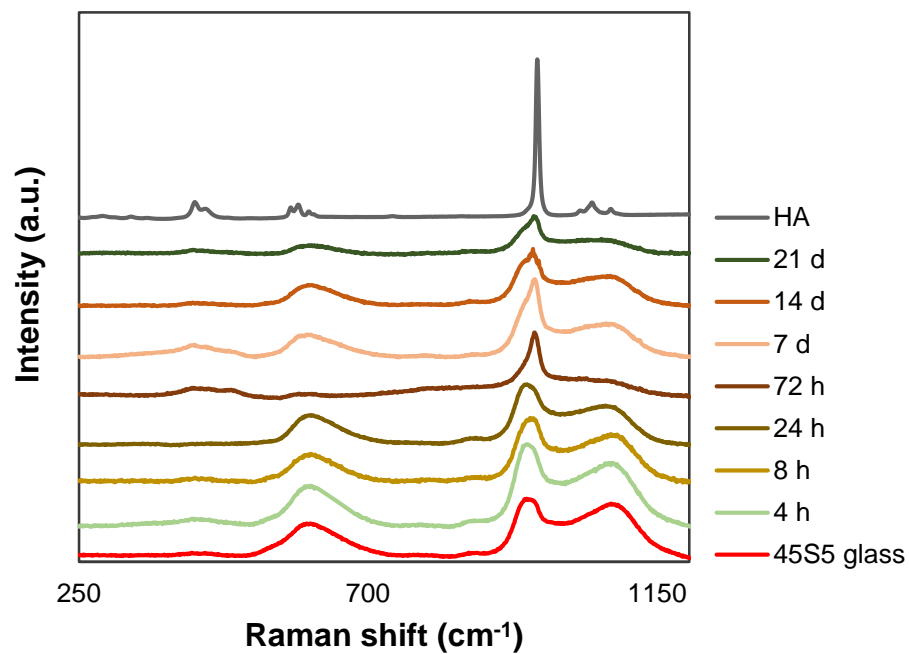

(b)

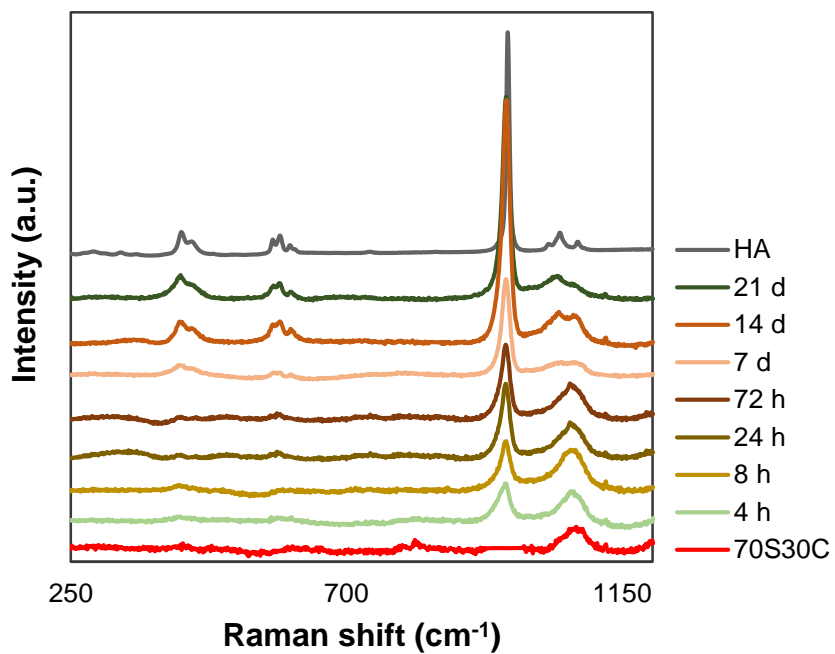

**Fig. S2** Raman spectra of 45S5 glass (a) and 70S30C (b) after different incubation times (DPBS, 37 °C, 4 h – 21 d).

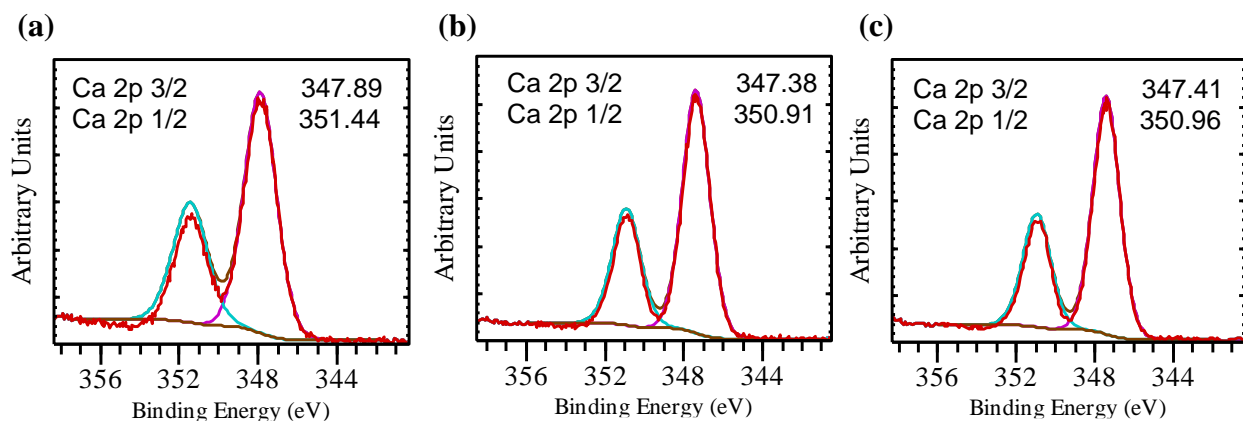

**Fig. S3** The high-resolution XPS spectra for Ca 2p of solvBG76 (a) and after 4 h (b) or 21 d (c) of incubation in DPBS.

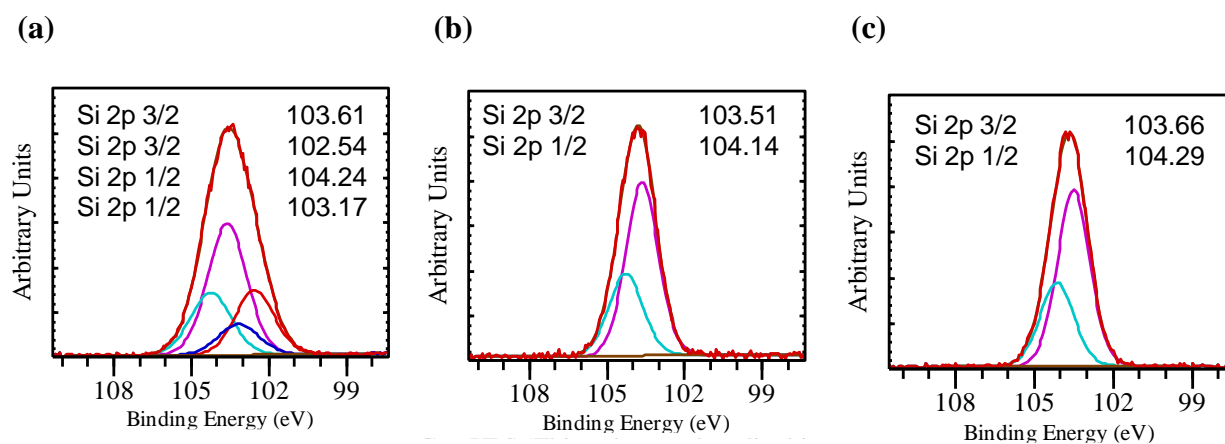

**Fig. S4** The high-resolution XPS spectra for Si 2p of solvBG76 (a) and after 4 h (b) or 21 d (c) of incubation in DPBS.

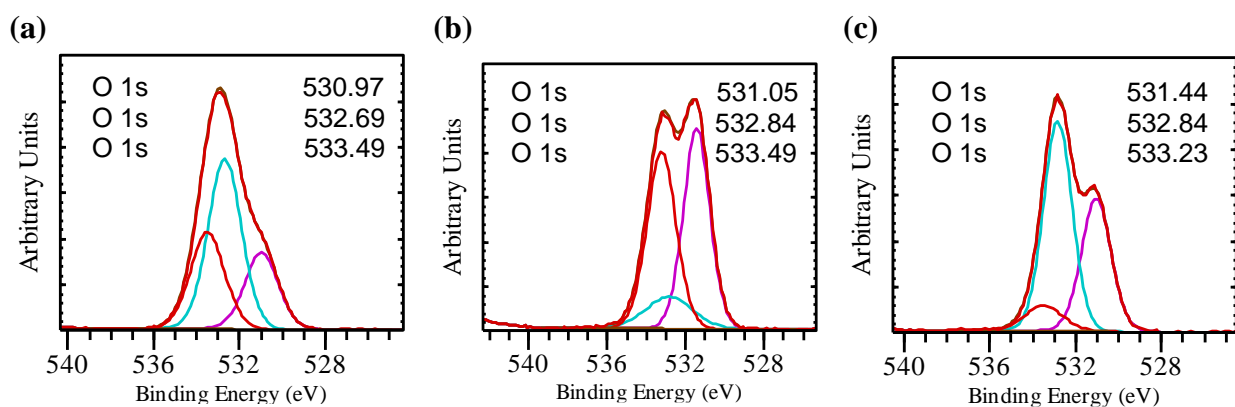

**Fig. S5** The high-resolution XPS spectra for O 1s of solvBG76 (a) and after 4 h (b) or 21 d (c) of incubation in DPBS.

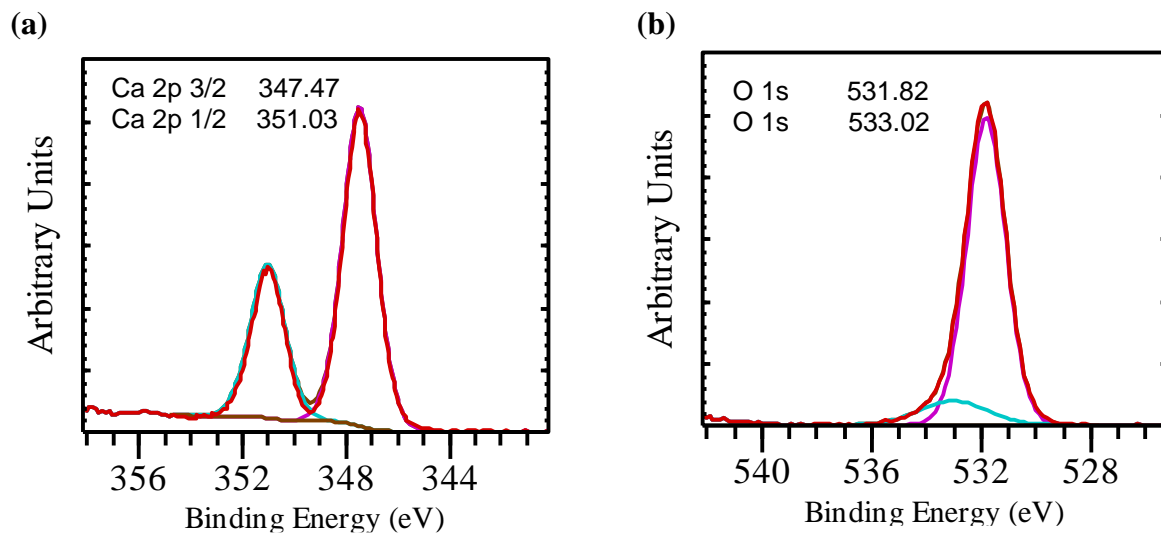

**Fig. S6** The high-resolution XPS spectra for Ca 2p (a) and O 1s (b) of hydroxyapatite.

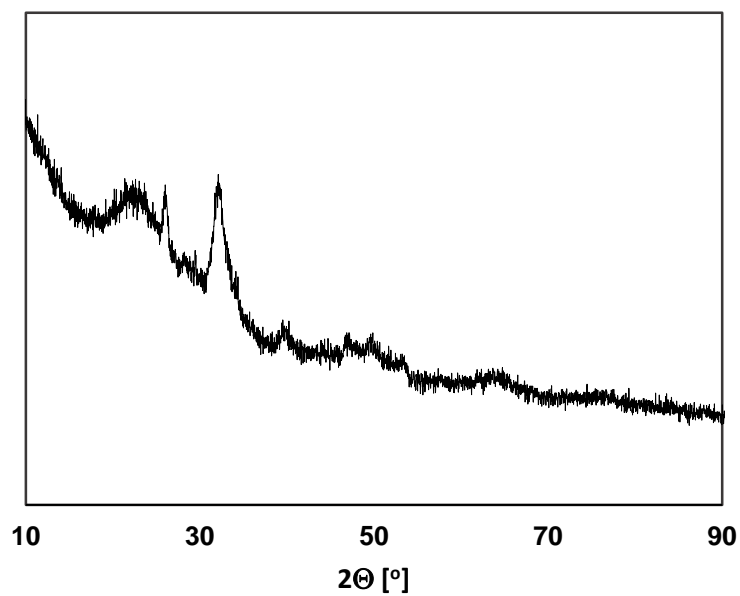

**Fig. S7** XRD pattern of solvBG76 after 30 min of incubation in DPBS.

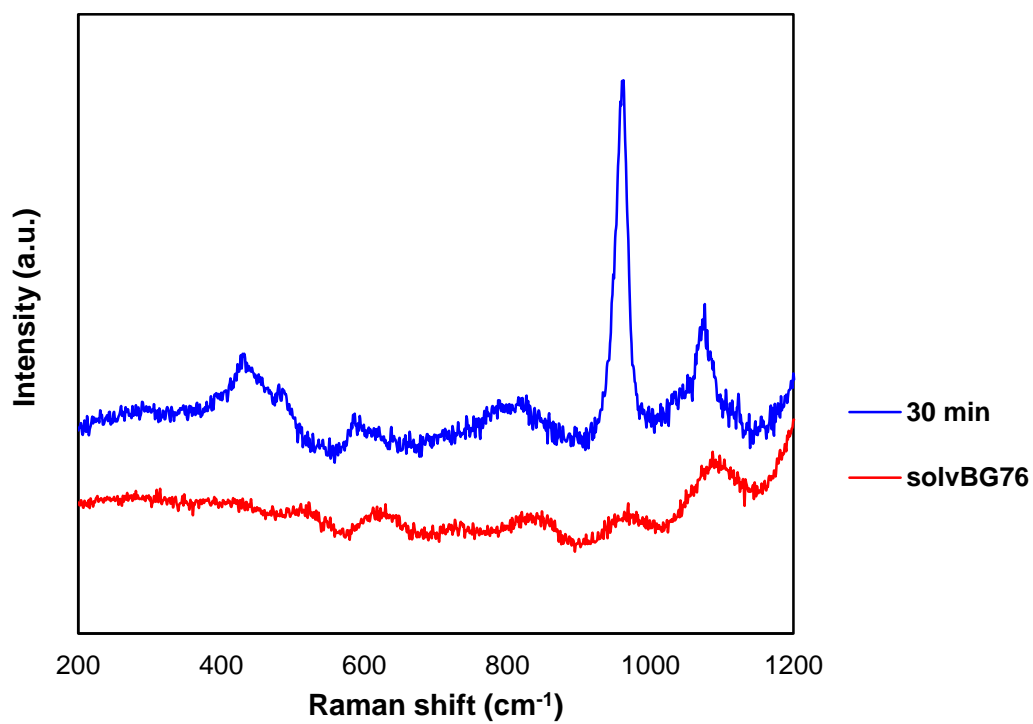

**Fig. S8** Raman spectra of solvBG76 glass obtained before and after 30 min of incubation in DPBS.

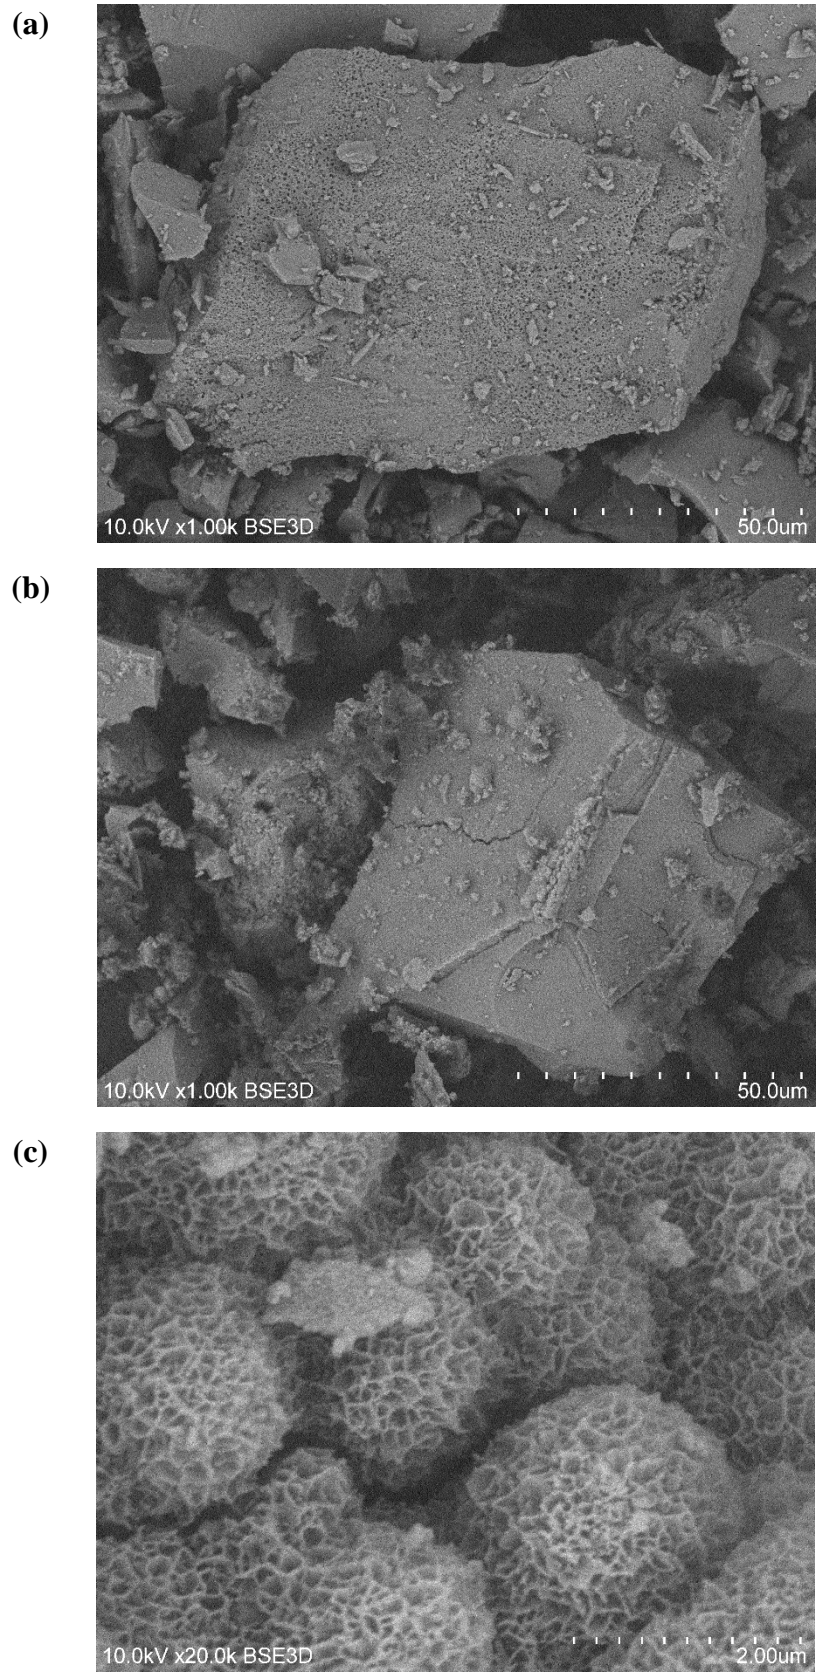

**Fig. S9** SEM images of 70S30C before (a) and after 21 d of incubation in DPBS (b-c).



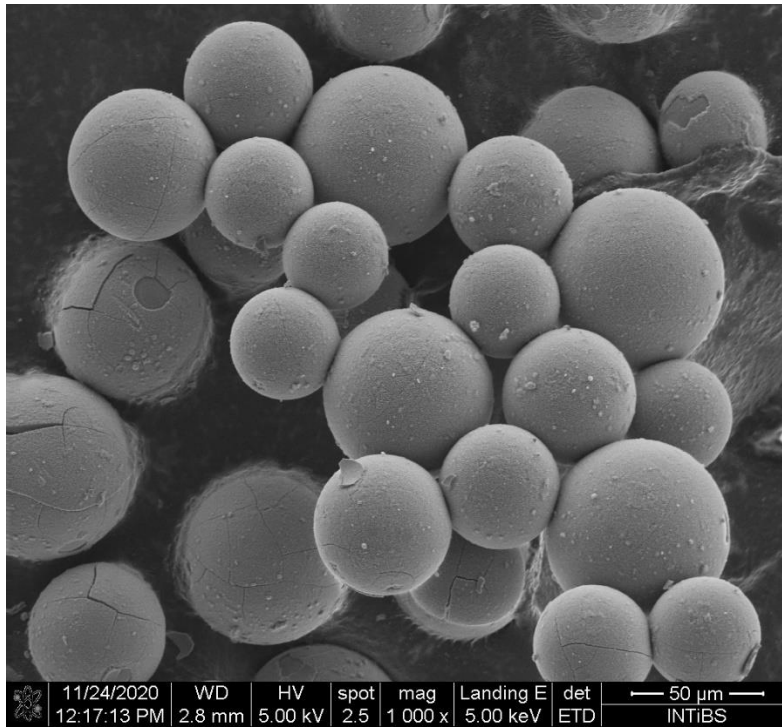

**Fig. S10** SEM images of 45S5 glass after 72 h of incubation in DPBS.

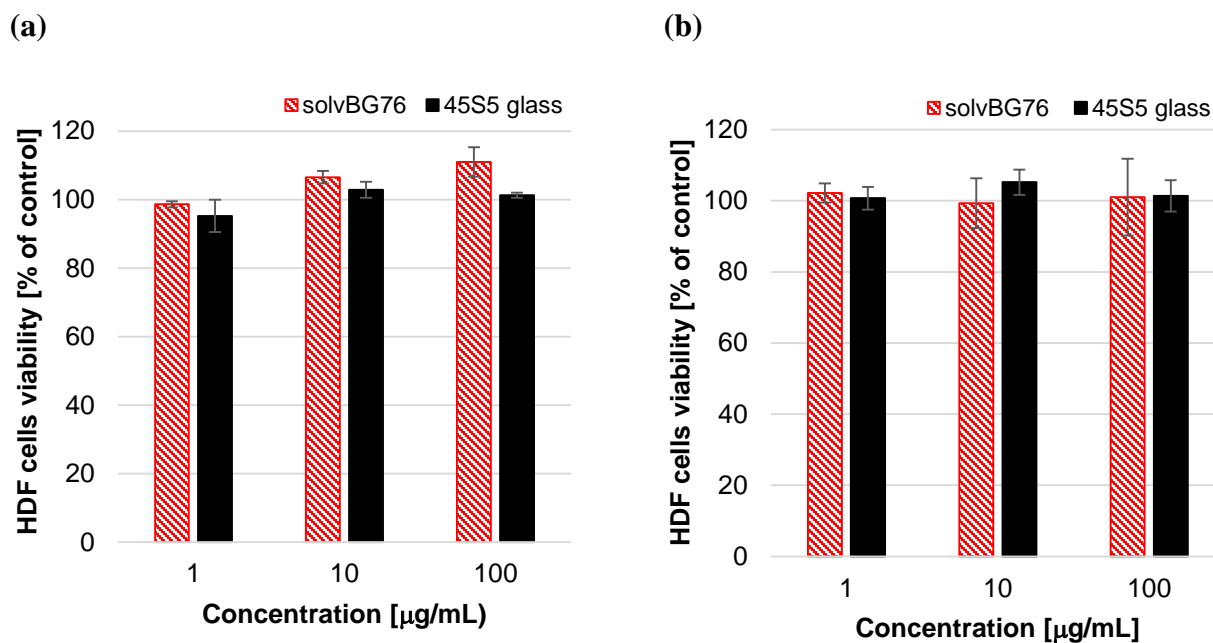

**Fig. S11** Viability of human dermal fibroblasts growing in the presence of solvBG76 and reference 45S5 glass for 24 h (a) and 48 h (b).

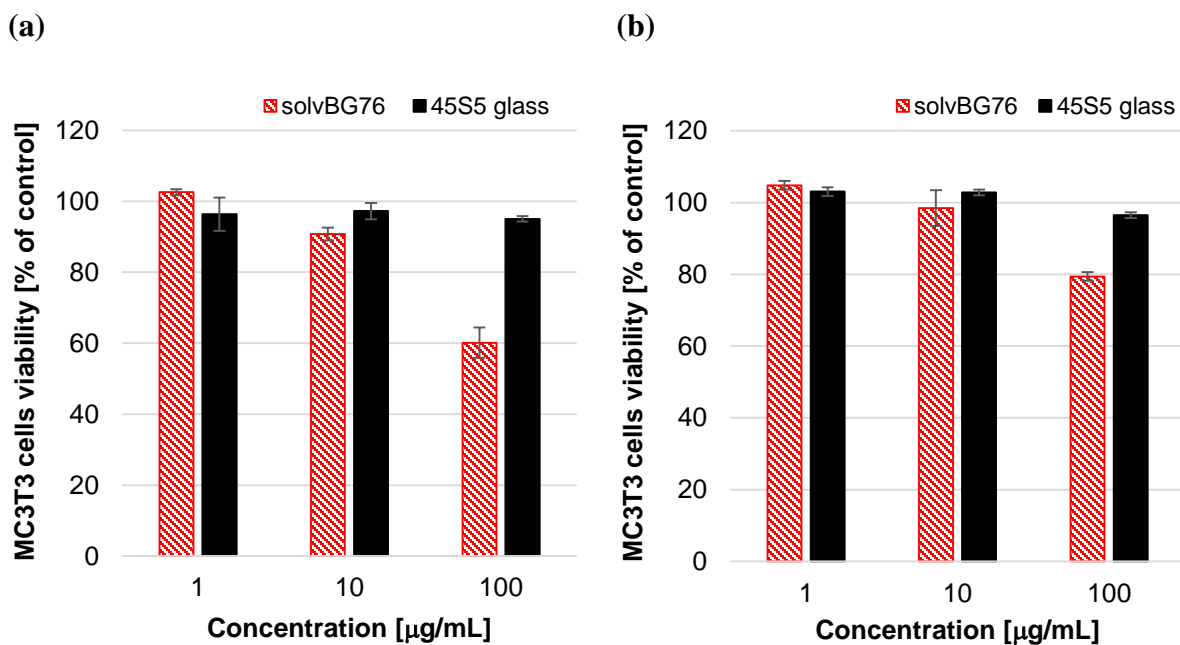

**Fig. S12** Viability of mouse osteoblasts growing in the presence of solvBG76 and reference 45S5 glass for 24 h (a) and 48 h (b).
